# Supplementary material
Source: HighWire-hosted journal article supplement (https://bmjopenquality.bmj.com/content/7/3/e000303)

Additional File 1: Final Version NSAID Bundle


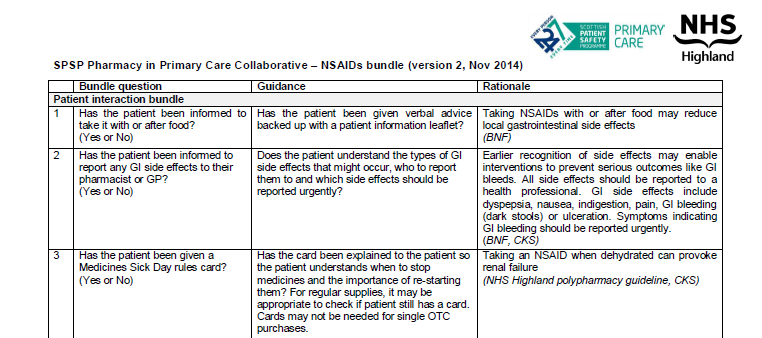

Supplement: inline-supplementary-material-1 [file inline-supplementary-material-1.docx]

Additional File 3: Driver Diagram


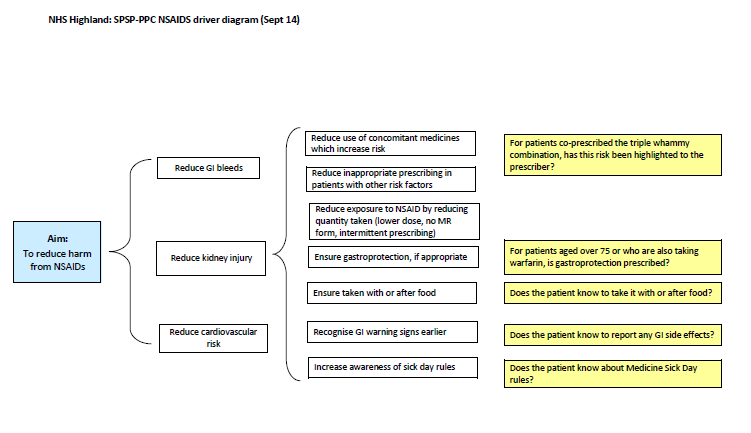

Supplement: inline-supplementary-material-3 [file inline-supplementary-material-3.docx]

Additional File 4: NHS Highland NSAIDs Safety Information Card

Front:


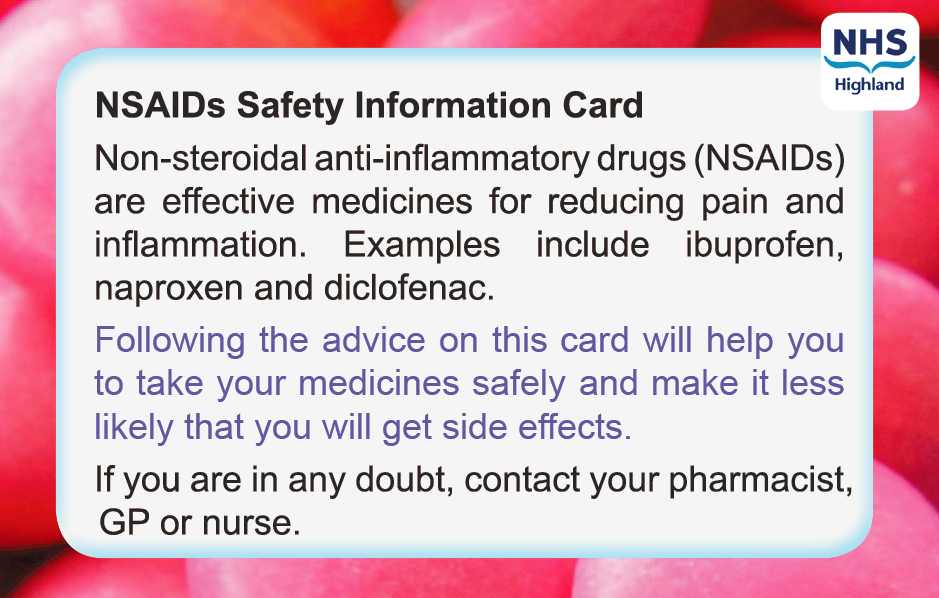


Reverse:


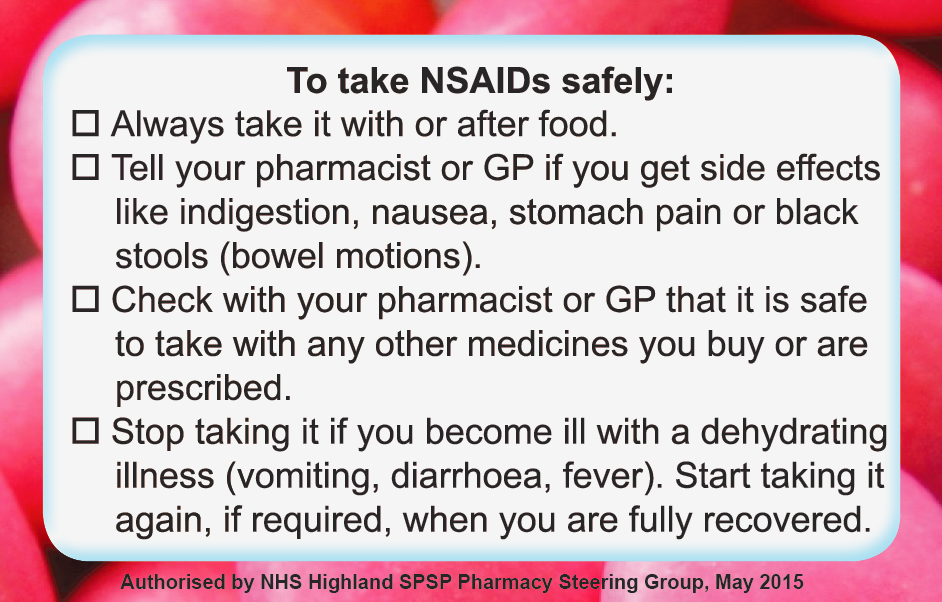

Supplement: inline-supplementary-material-4 [file inline-supplementary-material-4.docx]
